# Supplementary figures and images for: Biogeography and Genetic Diversity of Terrestrial Mites in the Ross Sea Region, Antarctica
Source: Preprints.org preprint supplement (doi:10.20944/preprints202302.0079.v1), 2023-02-06

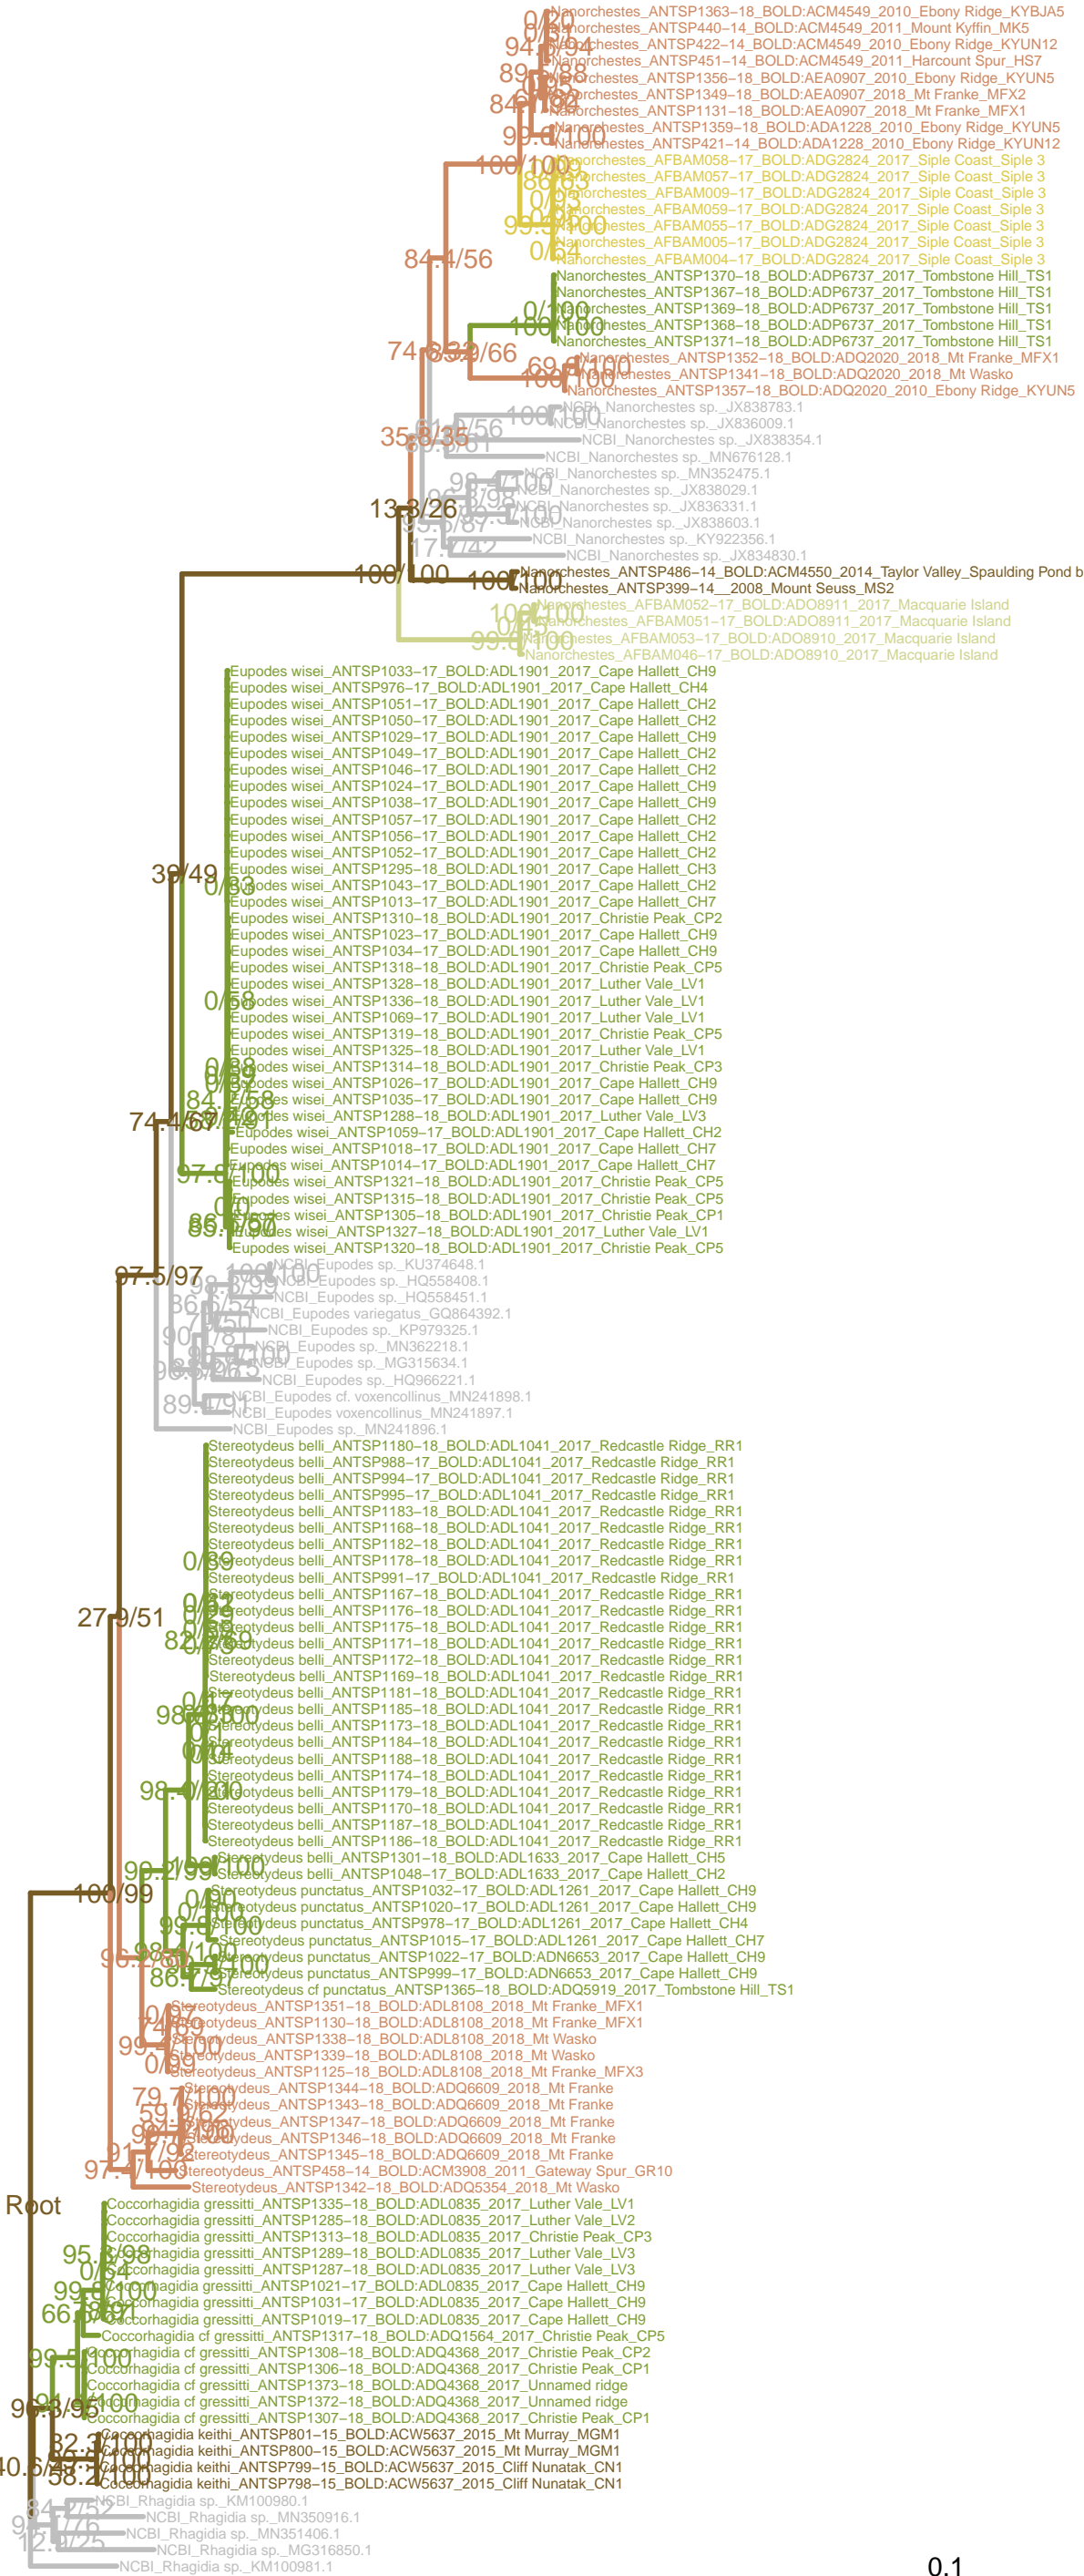

group

- NVL
- SVL
- QMM
- NCBI
- continental
- sub-Antarctic

0.1

Supplement: Supplementary file 1 [file supplementary]
